# Supplementary material
Source: publisher site journal article supplement (https://www.dovepress.com/article/163475)
Supplement: Supplementary file 1 [file get_supplementary_file.php%3Ff%3D163475.pdf]

**LIST AND DESCRIPTION OF INVESTIGATORS AND OTHER IMPORTANT PARTICIPANTS IN THE STUDY**

|                                                                                                                       |                                                                                                                    |                                                                                                            |                                                                                                                       |
|-----------------------------------------------------------------------------------------------------------------------|--------------------------------------------------------------------------------------------------------------------|------------------------------------------------------------------------------------------------------------|-----------------------------------------------------------------------------------------------------------------------|
| Cancer Ctrs of Southwest Okahoma Research<br>104 NW 31st Street<br>Lawton, OK USA 73505                               | Piedmont Hospital<br>1800 Howell Mill Road<br>7th Floor, Cancer Center ,<br>Suite<br>500<br>Atlanta, GA USA 30318  | Cancer Care Associates -<br>Mercy,<br>Oklahoma City<br>4205 McAuley Blvd<br>Oklahoma City, OK USA<br>73112 | Scottsdale Med Specialist<br>TGen<br>Clinical Research Services<br>13208 E Shea Boulevard<br>Scottsdale, AZ USA 85259 |
| CHUQ - Hotel-Dieu de Quebec<br>11 Cote du Palais<br>Quebec, QC Canada G1R<br>2J6                                      | UAB Comprehensive Cancer Center<br>619 19th Street South<br>Birmingham, AL USA 35249-3300                          | Pacific Shores Medical Group<br>1043 Elm Avenue<br>Long Beach, CA USA 90813                                | Jewish General Hospital<br>2401 Terra Crossing<br>Boulevard<br>Louisville, KY USA 40245                               |
| St. Mary Medical Center<br>Hematology-Oncology Group, PC<br>1205 Langhorne-Newtown Road<br>Langhorne, PA USA 19047    | Clearview Cancer Institute<br>Oncology Specialties, P.C<br>3601 CCI Drive<br>Huntsville, AL USA 35805              | Virginia Piper Cancer Institute<br>MN Onc Hem, PA<br>800 E 28th Street<br>Minneapolis, MN USA 55408        | Mayo Clinic Arizona<br>13400 E Shea Boulevard<br>Scottsdale, AZ USA 85259                                             |
| Royal Victoria Hospital,<br>Barrie<br>201 Georgian Drive<br>Barrie, ON Canada LYM6M2                                  | Tower Cancer Research Foundation<br>9090 Wilshire Blvd<br>Beverly Hills, CA USA 90211                              | IN Univ Simon Cancer Ctr<br>535 Barnhill Drive<br>Indianapolis, IN USA 46202                               | City of Hope Comprehensive Cancer Care Ctr<br>1500 E Duarte Road<br>Duarte, CA USA 91010                              |
| Tom Baker Cancer Ctr<br>1331 29th Street NW<br>Calgary, AB Canada T2N<br>4N2                                          | Univ of MN<br>420 Delaware Street<br>Minneapolis, MN USA 55455                                                     | Univ of NM<br>1201 Camino deSalud NE<br>Albuquerque, NM USA<br>87106                                       | William H. Isacoff, MD, Inc.<br>100 UCLA Medical Plaza<br>Los Angeles, CA USA 90024                                   |
| Sidney Kimmel Comp Cancer Ctr<br>at Johns Hopkins<br>1650 Orleans Street<br>Baltimore, MD USA 21231                   | Roswell Park Cancer Institute<br>Elm and Carlton Streets<br>Buffalo, NY USA 14263                                  | Hematology-Oncology Clinic<br>8595 Picardy Avenue<br>Baton Rouge, LA USA<br>70809                          | Lahey Clinic<br>41 Mall Road<br>Burlington, MA USA 01805                                                              |
| Med College of WI Froedtert<br>Multi-Disciplinary Cancer Clinic<br>9200 W Wisconsin Avenue<br>Milwaukee, WI USA 53226 | Atlanta Cancer Care<br>5670 Peachtree Dunwoody Road<br>Atlanta, GA USA 30342                                       | ME Ctr for Cancer Medicine and Blood Disorders<br>Scarborough, ME USA<br>04074                             | AZ Cancer Ctr<br>1515 N Campbell Avenue<br>Tucson, AZ USA 85724                                                       |
| Swedish Cancer Inst<br>1221 Madison Street<br>Seattle, WA USA 98104                                                   | Princess Margaret Hosp<br>610 University Avenue<br>Toronto, ON Canada M5G<br>2M9                                   | IL Cancer Care, PC<br>8940 N Wood Sage Rd.<br>Peoria, IL USA 61615                                         | Univ of Colorado Cancer Ctr<br>P.O. Box 6511<br>Aurora, CO USA 80045                                                  |
| Hopital du Sacre-Coeur de Montreal<br>5400 Gouin Boulevard W<br>Montreal, QC Canada H4J<br>1C5                        | Centre Hospitalier de L'Universite de Montreal St-Luc<br>1058 Saint Denis Street<br>Montreal, QC Canada H2X<br>3J4 | Cancer Ctr of Excellence - Univ of MA Med School<br>55 Lake Avenue N<br>Worcester, MA USA 01655            | Ctr for Cancer & Blood Disorders<br>- MD<br>6420 Rockledge Drive<br>Bethesda, MD USA 20817                            |

|                                                                                                        |                                                                                            |                                                                                                            |                                                                                          |
|--------------------------------------------------------------------------------------------------------|--------------------------------------------------------------------------------------------|------------------------------------------------------------------------------------------------------------|------------------------------------------------------------------------------------------|
| Desert Hem/Onc Medical Group<br>39800 Bob Hope Drive<br>Rancho Mirage, CA USA<br>92270                 | Lake County Onc & Hem FL Hosp<br>Waterman<br>4100 Waterman Way<br>Tavares, FL USA 32778    | Fred Hutchinson Cancer Research Center<br>1100 Fairview Avenue N<br>Seattle, WA USA 98109                  | St John's Med Res Inst<br>3231 S National Avenue<br>Springfield, MO USA 65807            |
| Tennessee Oncology<br>250 25th Avenue N<br>Nashville, TN USA 37203                                     | Cancer Care Associates - Tulsa<br>6475 S Yale Avenue<br>Tulsa, OK USA 74136                | dba The Mark H. Zangmeister Center<br>3100 Plaza Properties Blvd<br>Columbus, OH USA 43219                 | Georgia Cancer Specialist<br>1835 Savoy Drive<br>Atlanta, GA USA 30341                   |
| Signal Point Clinical Research Center, LLC<br>235 N Breiel Blvd<br>Middletown, OH USA 45042            | Northeast GA Cancer Care<br>3320 Old Jefferson Road<br>Athens, GA USA 30607                | SUNY Upstate Medical University<br>750 E Adams Street<br>Syracuse, NY USA 13210                            | FL Hospital Cancer Institute<br>2501 N Orange Avenue<br>Orlando, FL USA 32804            |
| Genesis Cancer Ctr - Hot Springs<br>133 Harmony Park Circle<br>Hot Springs, AR USA 71913               | Univ of OK Health Sciences Ctr<br>920 Stanton L. Young Blvd<br>Oklahoma City, OK USA 73104 | Huntsman Cancer Ctr<br>2000 Circle of Hope Drive<br>Salt Lake City, UT USA 84112                           | BC Cancer Agency-Vancouver<br>600 W 10th Avenue<br>Vancouver, BC Canada V5Z4E6           |
| Univ of Pittsburgh Med Ctr<br>5150 Center Avenue<br>Pittsburgh, PA USA 15232                           | Arena Onc Associates<br>1999 Marcus Avenue<br>Lake Success, NY USA 11042                   | Cancer Care & Hem Spec of Chicagoland<br>880 W. Central Road, Ste. 8200<br>Arlington Heights, IL USA 60005 | Piedmont Hem Onc Assoc, PLLC<br>1010 Bethesda Court<br>Winston Salem, NC USA 27103       |
| Palm Beach Institute of Hematology and Oncology<br>2320 S Seacrest Blvd<br>Boynton Beach, FL USA 33435 | Lakeland Regional Cancer Center<br>3525 Lakeland Hills Boulevard<br>Lakeland, FL USA 33805 | FL Cancer Spec<br>4331 Veronica S Shoemaker Blvd<br>Ft Myers, FL USA 33916                                 | Oncology Hematology Care<br>4350 Malsbary Road<br>Cincinnati, OH USA 45242               |
| University Cancer Institute, LLC<br>2240 Woolbright Road<br>Boynton Beach, FL USA 33426                | VA Cancer Inst<br>6605 W. Broad Street<br>Richmond, VA USA 23230                           | Chattanooga Oncology Hematology Care<br>605 Glenwood Drive<br>Chattanooga, TN USA 37404                    | Utah Cancer Specialist<br>3838 S 700 East<br>Salt Lake City, UT USA 84106                |
| Phoebe Cancer Ctr of Phoebe<br>Putney Mem Hosp<br>427 W 3rd Avenue<br>Albany, GA USA 31701             | Mary Bird Perkins Cancer Center<br>4950 Essen Lane<br>Baton Rouge, LA USA 70809            | Orchard Research<br>9711 Skokie Blvd Suite A<br>Skokie, IL USA 60076                                       | The Center for Cancer and Hematologic Disease<br>1930 Route 70 E<br>Camden, NJ USA 08003 |
| Univ of AR for Med Sciences<br>4301 W Markham Street<br>Little Rock, AR USA 72205                      | Sharp Memorial Hospital<br>7901 Frost Street<br>San Diego, CA USA 92123                    | South Texas Oncology and Hematology, P.A<br>4383 Medical Center Drive<br>San Antonio, TX USA 78229         | Providence Regional Cancer System<br>4525 3rd Avenue SE<br>Lacey, WA USA 98503           |

|                                                                                                                                 |                                                                                                               |                                                                                                                                                                   |                                                                                                       |
|---------------------------------------------------------------------------------------------------------------------------------|---------------------------------------------------------------------------------------------------------------|-------------------------------------------------------------------------------------------------------------------------------------------------------------------|-------------------------------------------------------------------------------------------------------|
| Cancer Center of the Carolinas<br>11 Doctors Park<br>Spartanburg, SC USA 29307                                                  | Rocky Mountain Cancer Ctrs, LLP<br>- Denver<br>1800 Williams Street<br>Denver, CO USA 80218                   | TX Cancer Ctr, Dallas Southwest<br>Texas Oncology/Methodist<br>Charlton Cancer Ctr.<br>3555 W Wheatland Road<br>Dallas, TX USA 75237                              | TX Onc, PA – Central<br>901 West 38th St. Suite 200<br>Austin, TX USA 78705                           |
| Cancer Care & Hematology Specialists of Chicagoland, P.C. -<br>Niles, IL<br>8915 W. Golf Road, 3rd Floor<br>Niles, IL USA 60714 | Northern AZ Hematology & Oncology Associates - AOA<br>3700 W Highway 89A<br>Sedona, AZ USA 86336              | Texas Oncology, PA<br>8220 Walnut Hill Lane<br>Dallas, TX USA 75231                                                                                               | Kettering Medical Center<br>3535 Southern Boulevard<br>Kettering, OH USA 45429                        |
| Ocala Oncology Center<br>433 SW 10th Street<br>Ocala, FL USA 34471                                                              | Texas Oncology, PA- Fort Worth<br>1001 12th Avenue<br>Fort Worth, TX USA 76104                                | TX Cancer Ctr, Dallas Southwest<br>7777 Forest Lane<br>Dallas, TX USA 75230-2510                                                                                  | Virginia Cancer Specialists, PC<br>8503 Arlington Blvd, Ste 400<br>Fairfax, VA USA 22031              |
| Texas Oncology-Texoma Cancer Center<br>5400 Kell W Blvd<br>Wichita Falls, TX USA 76310                                          | New York Oncology Hematology<br>P.C.<br>400 Patroon Creek Blvd<br>Albany, NY USA 12206                        | Texas Oncology- Plano East<br>3705 W. 15th Street<br>Plano, TX USA 75075                                                                                          | Adelaide Cancer Centre (T/A Ashford Cancer Ctr)<br>520 South Road<br>Kurrulta Park, SA Australia 5037 |
| Border Med Onc<br>Suite 1/69 Nordsvan Drive<br>Wodonga, VIC Australia 3690                                                      | Oncology Research<br>Level 2 Gordon St<br>Footscray, VIC Australia 3011                                       | Macarthur Cancer Therapy Centre<br>Campbelltown Hospital<br>Therry Road<br>Campbelltown, NSW Australia 2560                                                       | Sydney Cancer Centre<br>Building 76 Hospital Road<br>Concord, NSW Australia 2139                      |
| Prince of Wales Hosp<br>Department of Medical Oncology<br>Randwick, NSW Australia 2031                                          | Oncology Research Unit<br>Centre Rd<br>East Bentleigh, VIC Australia 3165                                     | Mater Private Medical Centre<br>Haematology & Oncology Clinics<br>of Australasia Research Centre<br>Level 5, 293 Vulture St<br>South Brisbane, QLD Australia 4101 | Department of Medical Oncology<br>Flinders Medical Centre<br>Bedford Park, SA Australia 5042          |
| Sir Charles Gairdner Hospital<br>B Block, Hospital Avenue<br>Nedlands, WA Australia 6009                                        | Bendigo Hospital<br>Oncology Unit, Bendigo Health<br>Corner Lucan & Arnold Sts<br>Bendigo, VIC Australia 3550 | Royal Brisbane and Women's Hospital<br>Level 5 West Block<br>Butterfield Street<br>Herston, QLD Australia 4029                                                    | Southern Medical Day Care Centre<br>410 Crown Street<br>Wollongong, NSW Australia 2500                |
| Calvary North Adelaide Hospital                                                                                                 | HOCA Gold Coast Cancer Centre                                                                                 | Newcastle Calvary Mater Hospital                                                                                                                                  | Royal Hobart Hospital<br>48 Liverpool Street                                                          |

|                                                                                                                                                                                                                                                                                                 |                                                                                                                                                                                                                                                                                                           |                                                                                                                                                                                         |                                                                                                                                                                                                                 |
|-------------------------------------------------------------------------------------------------------------------------------------------------------------------------------------------------------------------------------------------------------------------------------------------------|-----------------------------------------------------------------------------------------------------------------------------------------------------------------------------------------------------------------------------------------------------------------------------------------------------------|-----------------------------------------------------------------------------------------------------------------------------------------------------------------------------------------|-----------------------------------------------------------------------------------------------------------------------------------------------------------------------------------------------------------------|
| 89 Strangways Terrace<br>North Adelaide, South Aus.<br>Australia 5006                                                                                                                                                                                                                           | Premion Building, 39 White<br>Street<br>Southport, Gold Coast, QLD<br>Australia 4215                                                                                                                                                                                                                      | Edith St<br>Waratah, NDW Australia<br>2298                                                                                                                                              | Hobart, TAS Australia 7000                                                                                                                                                                                      |
| Alfred Hospital<br>Commercial Road<br>Melbourne, VIC Australia<br>3004                                                                                                                                                                                                                          | Bankstown-Lidcombe Hosp<br>68 Eldridge Road<br>Bankstown, NSW Australia<br>2200                                                                                                                                                                                                                           | Peninsula Oncology Centre<br>Frankston Private<br>Level 3, 24-28 Flinders Road<br>Frankston, VIC Australia<br>3199                                                                      | Russian Research Center for<br>Radiology and Surgical<br>Technologies under the<br>Federal<br>Agency for High-Tech<br>Medical<br>Care<br>70 Leningradskaya Ul.,<br>Pesochny<br>St. Petersburg, Russia<br>197758 |
| Leningrad Regional Clinical<br>Hospital<br>45-49 Lunacharskogo Pr.<br>St. Petersburg, Russia<br>194291                                                                                                                                                                                          | Clinical Hospital # 122 n.a.<br>L.G.<br>Sokolov under the Federal<br>Medical-Biological Agency<br>4 Kultury Pr.<br>St. Petersburg, Russia<br>194291                                                                                                                                                       | Russian Research Ctr of<br>Surgery<br>n.a. B.V. Petrovskiy under<br>the<br>Russian Academy of Med<br>Sciences<br>2 Abrikosovsky Per.<br>Moscow, Russia 119992                           | Moscow Municipal<br>Oncological<br>Hospital #62 under Moscow<br>Department of HealthcaABre<br>Stepanovskoye<br>Krasnogorskiy<br>District<br>Moscow, Russia 143423                                               |
| State Funded Higher<br>Educational<br>Institution of Advanced<br>Professional Education:<br>North-<br>West State Medical<br>University n.a.<br>I.I.Mechnikov<br>Legal: 41 Kirochnaya Ul.<br>St. Petersburg, Russia<br>191015<br>Actual: 47 Piskarevskiy Pr.<br>St. Petersburg, Russia<br>195067 | Russian Research Center of<br>Radiology under the Federal<br>Agency for Hi-Tec Medical<br>Care<br>86 Profsoyuznaya str.,<br>Moscow,<br>Russia 117997                                                                                                                                                      | Central Clinical Hospital and<br>Polyclinic under the<br>President's<br>Business Administration of<br>the<br>Russian Federation<br>15 Marshala Timoshenko str.<br>Moscow, Russia 121359 | Municipal Clinical Hospital<br>#57<br>under Moscow Department<br>of<br>Healthcare<br>32/61, 11-th Parkovaya str.<br>Moscow, Russia 105077                                                                       |
| Med Radiological Res Ctr<br>under<br>the Ministry of Health Care<br>and<br>Social Development of<br>Russian<br>Federation<br>4 Koroleva Ul.<br>Obninsk, Kaluga Region,<br>Russia<br>249036                                                                                                      | State Institution:<br>Dnipropetrovsk<br>State Medical Academy<br>under the<br>Ministry of Health of Ukraine;<br>Chemotherapy Department<br>at<br>Public Institution:<br>Dnipropetrovsk<br>City Multispecialty Clinical<br>Hospital #4 under<br>Dnipropetrovsk<br>Regional Council<br>9 Dzerzhinskogo str. | Volyn Regional Oncology<br>Center<br>1 Timiriazieva Vul., Lutsk,<br>Ukraine 43018                                                                                                       | Kharkiv Regional Clinical<br>Oncology Center<br>4 Lisoparkova Vul., Kharkiv,<br>Ukraine 61070                                                                                                                   |

|                                                                                                                                                                       |                                                                                                                                                  |                                                                                                                                                                           |                                                                                                                                                        |
|-----------------------------------------------------------------------------------------------------------------------------------------------------------------------|--------------------------------------------------------------------------------------------------------------------------------------------------|---------------------------------------------------------------------------------------------------------------------------------------------------------------------------|--------------------------------------------------------------------------------------------------------------------------------------------------------|
|                                                                                                                                                                       | Dnepropetrovsk, Ukraine<br>49044                                                                                                                 |                                                                                                                                                                           |                                                                                                                                                        |
| Lviv State Regional Treatment and Diagnostics Oncology Center<br>2a Hasheka Vul., Lviv, Ukraine<br>79031                                                              | Zhytomyr O.F. Herbachevskiy Regional Clinical Hospital<br>3 Chervonoho Khresta Vul., Zhytomyr, Ukraine 10008                                     | Kherson Regional Oncology Center<br>26-B Kindiiske Shose, Kherson, Ukraine 73000                                                                                          | Kirovohrad Regional Oncology Center<br>1 Yaltynska Vul., Kirovohrad, Ukraine 25031                                                                     |
| Kharkiv Regional Onc Ctr<br>4 Lisoparkivska Vul., Kharkiv<br>Kharkiv, Ukraine 61070                                                                                   | Zaporizhia Medical Academy of Postgraduate Education<br>20 Vintera Blvd<br>Zaporizhia, Ukraine 69096                                             | Pyatigorsk Oncological Center<br>31 Kalinina Pr., Pyatigorsk, Stavropol Territory Russia<br>357500                                                                        | Ivanovo Regional Oncology Center under Ivanovo Department of Healthcare<br>5 Lubimova Ul.<br>Ivanovo, Russia 153013                                    |
| Republican Clinical Oncological Center under the Ministry of Health of the Republic of Tatarstan<br>29 Sibirskiy Trakt, Kazan, Republic of Tatarstan Russia<br>420029 | Tula Regional Oncology Center<br>1B Yablochkova Ul., Tula, Russia 300053                                                                         | Omsk Regional Budget Medical Institution: Clinical Oncological Center<br>Block 1, 9 Zavertiayeva Ul.<br>Omsk, Russia 644013                                               | State Medical Institution of Yaroslavl Region: Regional Clinical Oncological Hospital<br>67 Oktyabrya Pr.<br>Yaroslavl, Russia 150040                  |
| Chelyabinsk Regional Oncological Center<br>42 Blukhera Ul.<br>Chelyabinsk, Russia 454087                                                                              | Republican Clinical Oncological Center under the Ministry of Healthcare of Republic of Bashkortostan<br>73/1 Oktiabria pr.<br>Ufa, Russia 450054 | Altai Territorial Oncological Center<br>77 Nikitina Ul<br>Barnaul, Russia 656049                                                                                          | Orenburg Regional Clinical Oncological Center<br>11, Gagarina Pr.<br>Orenburg, Russia 460021                                                           |
| Regional Oncological Center # 2<br>4, Herten St.<br>Magnitogorsk, Russia<br>455001                                                                                    | Donetsk Regional Antitumor Ctr<br>2a Polotska Vul.,<br>Donetsk, Ukraine, 83092                                                                   | National Institute of Cancer, Department of Tumors of Abdominal Cavity and Retroperitoneum<br>33/43 Lomonosova Vul.,<br>Kyiv, Ukraine 03022                               | Odessa Regional Clinical Hospital,<br>Department of General Surgery<br>26 Aakemika Zabolotnoho Vul.,<br>Odesa, Ukraine 65117                           |
| Kyiv City Clinical Hospital #10,<br>Center for Hepatic, Bile Duct and Pancreatic Surgery<br>59A 40-richia Zhovtnia Pr.,<br>Kyiv, Ukraine 03039                        | Central Clinical Hospital #2 n.a.<br>Semashko under OJSC Russian Railways<br>2 Budaiskaya Ul.<br>Moscow, Russia 129128                           | St. Petersburg Municipal Oncology Center<br>Legal: 3/5 2nd Berezovaya Alleya<br>St. Petersburg, Russia 197022<br>Actual: 56, Veteranov Pr., St. Petersburg, Russia 198255 | Russian Oncological Research Center n.a. N.N. Blokhin under the Russian Academy of Medical Sciences<br>24 Kashirskoye shosse,<br>Moscow, Russia 115478 |
| Klinikum Wels-Grieskirchen GmbH<br>Grieskirchner Str 42<br>Wels, Austria 4600                                                                                         | Krankenhaus der Barmherzigen Schwestern Linz<br>Seilerstätte 4 Innere Medizin I                                                                  | Landeskrankenhaus St. Pölten Propst Führer Straße 4 1.<br>Medizinische Abteilung<br>St. Pölten, Austria 3100                                                              | Medizinische Universität Wien<br>Währinger Gürtel 18-20 g<br>Wien, Austria 1090                                                                        |

|                                                                                                                                                                                    |                                                                                                                                |                                                                                                                                                                                         |                                                                                                                                                                     |
|------------------------------------------------------------------------------------------------------------------------------------------------------------------------------------|--------------------------------------------------------------------------------------------------------------------------------|-----------------------------------------------------------------------------------------------------------------------------------------------------------------------------------------|---------------------------------------------------------------------------------------------------------------------------------------------------------------------|
|                                                                                                                                                                                    | Abteilung für Hämatologie und Onkologie<br>Linz, Austria 4010                                                                  |                                                                                                                                                                                         |                                                                                                                                                                     |
| AZ Groeninge - Campus Sint-Niklaas<br>President Kennedylaan 4<br>Gastroenterologie<br>Campus Sint-Niklaas<br>Kortrijk, Belgium 8500                                                | UZ Leuven<br>Herestraat 49 UZ<br>Gasthuisberg<br>Leuven, Belgium 3000                                                          | Hopital Erasme<br>Route de Lennik 808<br>Brussels, Belgium 1070                                                                                                                         | Imelda VZW<br>Imeldalaan 9<br>Bonheiden, Belgium 2820                                                                                                               |
| H. Hartziekenhuis<br>Roeselare-<br>Menen vzw campus<br>Wilgenstraat<br>Wilgenstraat, 2<br>Roeselare, Belgium 8800                                                                  | Hôpital Beaujon<br>100 Boulevard du Général<br>Leclerc<br>Service de cancérologie<br>Clichy, France 92118                      | Hôpital Saint Antoine<br>184 Rue du Faubourg Saint-<br>Antoine Service d'Oncologie<br>Médicale<br>Paris, France 75571                                                                   | Centre Régional de lutte<br>contre le<br>cancer Paul Papin<br>2 Rue Moll Service<br>oncologie<br>médicale<br>Angers, France 49933                                   |
| Universitätsklinikum<br>Würzburg<br>Klinikstraße 6-8<br>Medizinische<br>Klinik und Poliklinik II<br>Würzburg, Germany 97070                                                        | Klinikum Oldenburg<br>Dr.-Eden-Strasse 10 Klinik<br>für<br>Onkologie und Hämatologie<br>Oldenburg, Germany 26133               | LMU Klinikum der Universität<br>Marchioninistr. 15<br>München, Germany 81377                                                                                                            | Kliniken Essen-Mitte<br>Henrici Straße 92 Klinik für<br>Innre<br>Medizin IV<br>Essen, Germany 45136                                                                 |
| Klinikum Freising<br>Alois-Steinecker-Straße 18<br>Akademisches<br>Lehrkrankenhaus<br>der TU München<br>Freising, Germany 85354                                                    | Praxis für Innere Medizin,<br>Dr.Oettle Helmut<br>Friedrichstr. 53<br>Friedrichshafen, Germany<br>88045                        | Azienda Ospedaliera<br>Niguarda Cà<br>Granda<br>Piazza Ospedale Maggiore,<br>3<br>Oncologia Medica Falck<br>Milano, Italy 20162                                                         | IRCCS Policlinico San<br>Matteo<br>Viale Golgi, 19 Struttura<br>Complessa di Oncologia<br>Medica<br>Pavia, Italy 27100                                              |
| Istituto Clinico Humanitas<br>Via Manzoni, 56<br>Dipartimento di Scienze<br>Onco-<br>Ematologiche<br>Unità Operativa di Oncologia<br>ed<br>Ematologia<br>Rozzano (MI), Italy 20089 | Istituto Nazionale Tumori<br>Regina<br>Elena<br>Via Elio Chianesi, 53<br>Oncologia Medica A<br>Roma, Italy 144                 | Fondazione Centro San<br>Raffaele<br>del Monte Tabor<br>Via Olgettina, 60<br>Dipartimento di<br>Oncologia<br>Milano, Italy 20132                                                        | Azienda Ospedaliera<br>Universitaria<br>Integrata di Verona<br>Piazzale L. Scuro, 10 UOC<br>di<br>Oncologia Medica Policlinico<br>Borgo Roma<br>Verona, Italy 37134 |
| Istituto Oncologico Veneto<br>Via Gattamelata, 64 Unità<br>Operativa di Oncologia<br>Medica I<br>Padova, Italy 35128                                                               | IST-Istituto Nazionale per la<br>Ricerca sul Cancro<br>Largo Rosanna Benzi, 10<br>Oncologia Medica A<br>Genova, GE Italy 16132 | IRCCS Ospedale<br>Oncologico di<br>Bari<br>Via Orazio Flacco, 65 Unità<br>Operativa di Oncologia<br>Medica<br>Sperimentale, Dipartimento<br>di<br>Oncologia Medica<br>Bari, Italy 70124 | Azienda Ospedaliero<br>Universitaria<br>Pisana<br>Via Roma 67 Unità<br>Operativa di<br>Oncologia Medica<br>Pisa, Italy 56126                                        |

|                                                                                                      |                                                                                                                                               |                                                                                                                            |                                                                                                                                         |
|------------------------------------------------------------------------------------------------------|-----------------------------------------------------------------------------------------------------------------------------------------------|----------------------------------------------------------------------------------------------------------------------------|-----------------------------------------------------------------------------------------------------------------------------------------|
| IRCCS Casa Sollievo della Sofferenza<br>Viale Cappuccini, 86<br>San Giovanni Rotondo, Italy<br>71013 | Istituto Europeo di Oncologia<br>-<br>IEO<br>Oncologia Medica Via<br>Ripamonti<br>435<br>Milano, Italy 20144                                  | Arcispedale Santa Maria<br>Nuova<br>Viale Risorgimento, 80<br>Reggio Emilia, Italy 42100                                   | E. O. Ospedali Galliera<br>Mura delle Cappuccine, 14<br>Genova, Italy 16128                                                             |
| Hospital Vall D'Hebron<br>Barcelona, Cataluña Spain<br>08035                                         | Centro Integral Oncológico<br>Clara<br>Campal<br>Calle Oña 10 Departamento<br>de<br>Oncología Médica<br>Madrid, Madrid Spain 28050            | Hospital Virgen del Rocio<br>Avenida de Manuel Siurot<br>s/n<br>Servicio de Oncología<br>Sevilla, Andalucía Spain<br>41013 | Hospital Clinico San Carlos<br>Servicio de Oncología<br>Medica C/<br>Professor Martin Lagos s/n<br>Madrid, Spain 28040                  |
| Hospital 12 de Octubre<br>Avda de Cordoba s/n<br>Madrid, Spain 28041                                 | Hospital Universitario Reina<br>Sofía<br>Avenida Menéndez Pidal s/n<br>Departamento de Oncología<br>Médica Córdoba, Andalucía,<br>Spain 14004 | Hospital Clinic I Provincial<br>C/ Villarroel, 170 Servicio de<br>Oncología Médica<br>Barcelona, Spain 8036                | Hospital Universitario Ramón<br>y<br>Cajal.<br>Servicio de Oncología<br>Médica<br>Ctra. De Colmenar, Km<br>9,100<br>Madrid, Spain 28034 |
